1 Hellbender Salamanders (*Cryptobranchus alleganiensis*) Exhibit an Ontogenetic Shift in  
2 Microhabitat Use in a Blue Ridge Physiographic Region Stream

3

4 K. A. Hecht<sup>1,2</sup>, M. J. Freake<sup>3</sup>, M. A. Nickerson<sup>2</sup>, and P. Colclough<sup>4</sup>

5

6 Running Title: Ontogenetic shift in Hellbender microhabitat

7

8 Keywords: Amphibian, Ecology, Lotic, Salamander, Shelter, Substrate

9

10 <sup>1</sup> PO Box 116455, School of Natural Resources and Environment, University of Florida,  
11 Gainesville, Florida 32611; Email: [kirstenhecht@ufl.edu](mailto:kirstenhecht@ufl.edu) ; Twitter: @HellbenderHecht

12 <sup>2</sup> PO Box 117800 Florida Museum of Natural History, University of Florida, Gainesville, Florida  
13 32611; Email: [maxn@flmnh.ufl.edu](mailto:maxn@flmnh.ufl.edu)

14 <sup>3</sup>Department of Natural Sciences and Mathematics, Lee University, Cleveland, Tennessee 37320;  
15 Email: [mfreake@leeuniversity.edu](mailto:mfreake@leeuniversity.edu)

16 <sup>4</sup> Zoo Knoxville, 3500 Knoxville Zoo Drive, Knoxville, Tennessee 37914; Email:  
17 [pcolclough@zooknoxville.org](mailto:pcolclough@zooknoxville.org)

18

19

20

21 **ABSTRACT**

22 Organisms that experience large changes in body size during the life span often exhibit  
23 differences in resource use among life stages. Ontogenetic shifts in habitat use reduce  
24 intraspecific competition and predation and are common in lotic organisms. Although  
25 information on the immature life stages of the Hellbender (*Cryptobranchus alleganiensis*) is  
26 limited, this aquatic salamander exhibits ontogenetic shifts in habitat use in some streams, with  
27 adults sheltering under large rocks and larvae utilizing interstitial spaces of gravel beds. Due to  
28 the geomorphology of Little River, Tennessee, however, limited interstitial spaces within the  
29 gravel are filled with sand. Therefore, we quantified microhabitat parameters for three life stages  
30 of Hellbenders (larvae, sub-adult, adult) to determine if an ontogenetic shift in microhabitat  
31 occurred in Little River. We found no significant differences in stream substrate at capture sites  
32 among the stages, but there was a positive correlation between rock shelters underlain with very  
33 coarse gravel and overall Hellbender occupancy. Although we found no difference in water  
34 quality parameters and streambed particle size among the stage classes at the sites of capture,  
35 there was a significant difference in the average shelter size among all stages, with larvae  
36 utilizing the smallest shelters. Based on these results, future Hellbender research and  
37 conservation efforts should consider differences in life stage habitat use as well as specific stream  
38 particle classes.

39

40

41

42

43           Body size is a key factor in many facets of ecology. At larger scales, the size of species  
44 helps determine the trophic structure and spatial distribution of ecological communities  
45 (Hutchinson and MacArthur, 1959; Schoener, 1974; Werner and Gilliam, 1984; Brown and  
46 Nicoletto, 1991; Woodward et al., 2005; Rojas and Ojeda, 2010), while at the individual scale  
47 body size influences energetics (Gillooly et al., 2001), prey (Wilson, 1975; Mittelbach, 1981;  
48 Cohen et al., 1993), habitat use (Hall and Werner, 1977; Foster et al., 1988; Flinders and  
49 Magoulick, 2007; Barriga and Battini, 2009; Foster et al., 2009), and predation risk (Werner and  
50 Hall, 1988; Giller and Malmqvist, 1998; Urban, 2008). Because size has such a strong influence  
51 on the ecology of organisms, species that experience large changes in body size during their  
52 lifespan can experience substantial differences in ecology across life stages. Werner and Gilliam  
53 (1984) defined these changes (i.e., ontogenetic shifts) as the “patterns in an organism’s resource  
54 use that develop as it increases in size from birth or hatching to its maximum.” While these  
55 changes are often a result of morphological constraints, change in resource use across the life  
56 span of a species can be an advantageous life history strategy. These shifts may reduce  
57 intraspecific competition and predation among stage classes (Werner and Gilliam, 1984). In  
58 cannibalistic species shifts in habitat use among size or stage classes can reduce mortality of  
59 young individuals by intraspecific predation (Foster et al., 1988; Keren-Rotem et al., 2006).

60           Body size changes in species are especially relevant in lotic systems. Reynolds number,  
61 which is the ratio of inertial and viscous forces within a fluid, increases with body size (Giller  
62 and Malmqvist, 1998). Organisms with different Reynolds numbers experience varying impacts  
63 from stream flow with inertial forces becoming more important at higher Reynolds numbers and  
64 may also differ in gas exchange abilities (Giller and Malmqvist, 1998). Body size influences  
65 microhabitat use in streams, with larger individuals more likely to reside in the water column and

66 smaller animals governed by viscous forces typically inhabiting the stream substrate. Because of  
67 these differences, ontogenetic shifts in resource use are documented in aquatic organisms and  
68 occur in a wide range of lotic taxa across different trophic levels including invertebrates  
69 (Holomuzki and Short, 1990; Giller and Sangpradub, 1993; Flinders and Magoulick, 2007), fish  
70 (Merigoux and Ponton, 1998; Simonovic et al., 1999; Rosenberger and Angermeier, 2003; King,  
71 2005; Barriga and Battini, 2009) and salamanders (Petranka, 1984; Colley et al., 1989; Nickerson  
72 et al., 2003). These shifts in resource use among life stages may help mitigate challenging  
73 conditions in lotic environments such as flow, environmental variability, and limited dispersal  
74 potential by providing increased protection and food availability and decreased intraspecific  
75 competition (Werner and Hall, 1988; Colley et al., 1989; Giller and Malmqvist, 1998; Nickerson  
76 et al., 2003; Barriga and Battini, 2009)

77         Ontogenetic shifts in resource use have been noted in the Hellbender (*Cryptobranchus*  
78 *alleganiensis*), a cannibalistic lotic salamander species that can increase in size over its lifetime  
79 by a factor of 20. Hatchlings measure 25 – 30 mm total length (TL), while the largest adult found  
80 measured 745 mm TL (Fitch, 1947). Larval Hellbender diet largely consists of aquatic insects  
81 (Smith, 1907; Pitt and Nickerson, 2006; Hecht et al., 2017) whereas adults mostly eat crayfish  
82 (Netting, 1929; Green, 1933; Green, 1935; Nickerson and Mays, 1973; Peterson et al., 1989).  
83 While there are very little data available on larval Hellbender ecology due to a lack of captures  
84 during surveys, researchers have noted that larval Hellbenders in some localities can utilize  
85 different microhabitat than adults, which generally shelter under large rocks (Bishop, 1941; Hillis  
86 and Bellis, 1971; Nickerson and Mays, 1973, Freake and DePerno, 2017). In the North Fork of  
87 the White River, Missouri, larvae have been associated with gravel beds (Nickerson et al., 2003),

88 whereas bank searches in the Allegheny River, New York, were more effective for smaller  
89 Hellbender size classes than in previous conventional rock lifting surveys (Foster et al., 2009).

90 In Little River, Tennessee geology of the streambed led to sand and other small particles  
91 filling in the interstitial spaces within the gravel where larvae have been found in other streams  
92 (Nickerson et al., 2003; Pitt et al., 2016); thus, larvae have been found under rocks on the  
93 streambed surface like adults (Nickerson et al., 2003). Despite this difference, almost a third of  
94 sampled Hellbenders from Little River were larval sized (<125 mm) (Hecht-Kardasz et al., 2012).  
95 Due to the cannibalistic nature of Hellbenders (Humphries et al., 2005; Groves and Williams,  
96 2014) as well as the great change in size from hatching to maturation, we expected that  
97 Hellbenders would still exhibit ontogenetic shifts in microhabitat at this location. To test this  
98 hypothesis, we examined the following microhabitat factors at sites where we captured  
99 Hellbenders in Little River: water depth, shelter size, stream substrate, pH, conductivity, and  
100 water temperature. These factors are known to affect detectability, food sources, oxygen  
101 concentration, and health of aquatic organisms (Giller and Malmqvist, 1998).

## 102 **MATERIALS AND METHODS**

103 *Site description.*—Based on the results of a previous study (Nickerson et al., 2003), Hellbender  
104 surveys were conducted within an ~3 km protected and forested section of Little River known to  
105 contain the three stage classes (larvae, sub-adult, and adult). Little River, located in the eastern  
106 Tennessee portion of the Great Smoky Mountains National Park, originates on the north slope of  
107 Clingmans Dome, and flows 29 km within the park. It continues through the towns of Townsend,  
108 Maryville, Alcoa, and Rockford before eventually draining into the Tennessee River. The Little  
109 River watershed drains an area of approximately 980 km<sup>2</sup>.

110 Little River lies entirely within the southern portion of the Blue Ridge physiographic  
111 province. The bedrock of Little River is comprised primarily of late Precambrian Elkmont and  
112 Thunderhead metamorphosed sandstone (Mast and Turk, 1999). Over time flowing water has  
113 eroded away some exposed bedrock leaving large densities of rounded boulders, cobble, and  
114 gravel in the streambed. A Wolman pebble count (Wolman, 1954) in the study area found a D50  
115 value, which represents the median substrate size, in the very coarse gravel category (32--64 mm)  
116 (Hecht-Kardasz, 2011). Interstitial habitat is limited within the Little River streambed as sand  
117 often fills in many portions of the gravel beds. The elevation of the study area ranged from 327—  
118 407 m. Vegetation within the stream was uncommon, and the riparian vegetation was classified  
119 as pine and river cove hardwood forest (Madden et al., 2004). The area has a temperate climate,  
120 with an average annual rainfall of 142 cm and temperature averages of 3.17 °C in winter and 21.7  
121 °C in summer (National Oceanic and Atmospheric Administration, 2016).

122 ***Field methods.***—Diurnal skin diving combined with rock lifting was used to survey for  
123 Hellbenders during the following sampling periods: June – July 2005, June – July 2006, June –  
124 Aug 2008, Aug – Oct 2009, July – Sept 2010. Some surveyors occasionally used log peaveys to  
125 lift larger rocks. Hellbenders were captured by hand. We measured total length (TL) and snout-  
126 vent length (SVL) of most sub-adult and adult Hellbenders with the aid of modified PVC pipe.  
127 Hellbenders were individually marked before release using PIT tags. Larvae and sub-adults too  
128 small for PIT tags were marked using visible implant elastomer (see Hecht-Kardasz et al., 2012).  
129 We only included the initial habitat data from recaptured animals for analyses.

130 Microhabitat parameters were measured directly at the point of capture. Because  
131 Hellbenders are largely nocturnal (Nickerson and Mays, 1973) and generally have small home  
132 ranges and exhibit site fidelity (Hillis and Bellis, 1971; Wiggs, 1977; Nickerson and Mays, 1973;

133 Blais, 1996; Ball, 2001), we assumed that the microhabitat at point of capture accurately  
134 represented microhabitat of Hellbenders during the survey period. Water temperature, pH, and  
135 conductivity were measured using the Combo pH/EC/TDS/Temperature Tester with Low Range  
136 EC and Watercheck pH reader (HANNA Instruments®, Woonsocket, RI, USA). Water depth and  
137 shelter size, defined as the longest length of the shelter rock, were also recorded.

138 To test for differences in stream substrate associated with shelter rocks, we measured a  
139 handful of streambed particles under confirmed shelter rocks using the Federal Interagency  
140 Sedimentation Project (FISP) US SAH-97 sediment size analyzer, also known as a gravelometer.  
141 Samples ranged from 1 – 8 particles, with a mean of 4.23 ( $\pm$  1.55) particles. To compare the  
142 stream substrate beneath shelters with the streambed particles in the general sampling area, we  
143 also measured a handful of substrate at fifty random localities within the study area chosen using  
144 a random number table. Samples were taken directly next to the right foot with eyes averted. We  
145 sampled below larger rocks when they were encountered.

146 **Analyses.**—Individual Hellbenders were classified into stage classes using TL. We used TL in  
147 our analyses so we could directly compare our results to past Hellbender habitat studies (Hillis  
148 and Bellis, 1971; Humphries and Pauley, 2005). Individuals <125 mm in TL, both gilled and  
149 non-gilled, were classified as larvae. Larvae were also classified into first (<90 mm TL) and  
150 second year (>100 mm TL) age classes for shelter size analysis based on previous studies and the  
151 results of surveys in Little River (Smith, 1907; Bishop, 1941; Hecht-Kardasz et al., 2012). Three  
152 individuals between 90 – 100 mm TL could not be classified to an age class and were therefore  
153 not used in analysis comparing larval age classes. All individuals measuring 125 – 275 mm TL  
154 were considered sub-adults, while any individuals over 275 mm were classified as adults. Further  
155 justification for stage class classifications can be found in Hecht-Kardasz et al., 2012.

156 We analyzed data using base packages in R version 3.2.2 (R Core Team, 2015) unless  
157 otherwise specified. We calculated mean ( $\pm$  SD) for all continuous normally-distributed habitat  
158 variables and median for non-normal continuous variables. Pearson's correlation coefficients for  
159 all variables was below 0.5. To examine the relationships between habitat variables and  
160 Hellbender TL, we performed simple linear regressions. Habitat parameters were also compared  
161 among life stages. As water depth, larval shelter size, and conductivity data were not normally  
162 distributed, these parameters were tested using Kruskal-Wallis rank sum tests with pairwise  
163 comparisons performed using the `pairw.kw` function in the `asbio` package (Aho, 2014). The  
164 remaining normally distributed parameters were evaluated using ANOVA and t-tests. In order to  
165 control family wise error rate at 0.05, Bonferroni's correction was used for all individual pairwise  
166 test of means.

167 All streambed particle sizes were classified into categories according to the American  
168 Geophysical Union proposed grade scale (Lane, 1947). Due to the low presence of some  
169 categories, all particles  $<4$  mm were combined into one category before the data were used for  
170 statistical analysis. The presence/absence of streambed particle size at the site of capture was  
171 compared among stage classes using an ordinal logistic regression with the `lrm` function in  
172 package `rms` (Harrell, 2015). We also performed a binary logistic regression model using the `lrm`  
173 function to compare the presence/absence of particle categories between occupied sites and  
174 random locations. Due to weak correlations between smaller streambed particle size categories,  
175 additional models were tested combining all particles  $<32$  mm into one category.

## 176 **RESULTS**

177 Average pH at capture sites was  $7.24 \pm 0.28$  (range 6.74 – 8.10;  $n = 97$ ). Mean  
178 conductivity was  $12.98 \pm 2.41$   $\mu\text{S}/\text{cm}$  (range: 6.00 – 22.00  $\mu\text{S}/\text{cm}$ ;  $n = 79$ ). Water depth (range:



179 210 – 1800 mm;  $n = 104$ ) and water temperature (range: 14.60 – 22.80 °C;  $n = 103$ ) averaged  
180  $527.86 \pm 248.00$  mm and  $22.84 \pm 2.03$  °C respectively. Although regression analysis suggested a  
181 linear relationship between Hellbender TL and water temperature ( $n = 102$ ), water temperature  
182 was not a strong predictor of Hellbender TL ( $R^2 = 0.042$ ;  $p = 0.039$ ). A similar relationship was  
183 found between conductivity and Hellbender TL ( $R^2 = 0.080$ ;  $p = 0.012$ ;  $n = 78$ ). Linear regression  
184 analysis revealed no relationship between Hellbender TL and water depth ( $n = 104$ ) ( $R^2 = 0.024$ ;  
185  $p = 0.12$ ) or Hellbender TL and pH ( $n = 96$ ) ( $R^2 = -0.011$ ;  $p = 0.94$ ). No significant difference in  
186 average water depth ( $H(2) = 4.32$ ;  $p = 0.12$ ), pH ( $F(2,97) = 0.61$ ;  $p = 0.55$ ) or temperature ( $F(2,$   
187  $99) = 1.751$ ;  $p = 0.179$ ) was found among stage classes. Average conductivity was significantly  
188 different among stage classes ( $H(2) = 8.03$ ;  $p = 0.018$ ). Posthoc pairwise comparisons found a  
189 significant difference between larval mean conductivity ( $14.93 \pm 4.34$   $\mu\text{S/cm}$ ;  $n = 14$ ) and mean  
190 adult conductivity ( $12.53 \pm 1.59$   $\mu\text{S/cm}$ ;  $n = 43$ ;  $p = 0.018$ ). There was no significant difference  
191 between larval and mean sub-adult conductivity ( $12.59 \pm 1.30$   $\mu\text{S/cm}$ ;  $n = 22$ ;  $p = 0.051$ ) or  
192 between adult and sub-adult conductivity ( $p = 0.99$ ) (Fig. 1).

193 Shelter size ranged from 120 – 1470 mm with a mean of  $673.81 \pm 285.75$  mm ( $n = 217$ ).  
194 Based on the results of linear regression, we found a weak correlation between Hellbender TL  
195 and shelter size ( $n = 217$ ) ( $R^2 = 0.266$ ;  $p < 0.001$ ) (Fig. 2). Although overall shelter size among  
196 the stage classes overlapped, average shelter size differed significantly among stage classes ( $F(2,$   
197  $214) = 32.82$ ;  $p < 0.001$ ; Fig. 3). Mean shelter size of larvae ( $464.36 \pm 244.65$  mm;  $n = 61$ ) was  
198 significantly different from both adults ( $794.44 \pm 254.27$  mm;  $n = 100$ ;  $t = 8.11$ ,  $df = 159$ ,  $p\text{-value}$   
199  $= <0.001$ ) and sub-adults ( $686.55 \pm 252.46$  mm,  $n = 56$ ;  $t = -4.83$ ,  $df = 115$ ,  $p = <0.001$ ). Sub-  
200 adults ( $n = 56$ ) and adults ( $n = 100$ ) also differed significantly in mean shelter size ( $t = 2.55$ ,  $df =$   
201  $154$ ,  $p = 0.012$ ). There was no statistical difference between mean shelter size between first ( $n =$

202 49) and second year larvae (n = 9) in Little River ( $H(1) = 0.16$ ,  $p = 0.69$ ). However, first year  
203 larvae utilized some larger shelter sizes, including one of 1085 mm while the largest shelter size  
204 of second year larvae was 610 mm. One individual of 90 mm TL found beneath a 1286 mm  
205 boulder could not conclusively be categorized as a first or second year larva.

206 Streambed particle classes under shelter rocks of larvae (n = 25), sub-adults (n = 26), and  
207 adults (n = 38) did not differ significantly (Table 1). There was no significant difference when  
208 particles <32 mm were combined. When comparing random samples to locations of capture,  
209 however, Hellbenders appeared to utilize shelters underlain at least partially by very coarse  
210 gravel more than would be expected by chance (Table 2). Our model also found a negative  
211 association between Hellbender use and rock shelters overlaying fine gravel. Very coarse gravel  
212 was the only significant term in the model combining particles <32mm ( $p < 0.001$ ).

## 213 **DISCUSSION**

214 While all Hellbender stage classes utilized boulder habitat, the significant difference in  
215 average shelter size among stage classes suggests that an ontogenetic shift in Hellbender habitat  
216 use occurs in Little River during the summer months. However, the wide range of shelter sizes  
217 used by larvae includes a direct overlap in shelter size with sub-adults and adults, which may be  
218 partially due to some young individuals dispersing from their site of hatching later than others.  
219 Young Hellbenders may remain in nesting sites for prolonged periods, as larval Hellbenders have  
220 been observed sharing rock shelters with adult males in June and August (Groves et al., 2015).  
221 Second year larvae could be more selective in their choice of shelter due to experience with  
222 predators, however the sample size of second year larvae was relatively small so further research  
223 is warranted. The weak relationship of shelter size and Hellbender TL found during this study is  
224 notable because previous studies examining habitat use by Hellbenders have generally found no

225 association between shelter size and Hellbender size (Hillis and Bellis, 1971; Humphries and  
226 Pauley, 2005). However, these studies have focused primarily on adult-sized Hellbenders. A  
227 study in a 350 m section of the dam-impacted Hiwassee River (TN) found a similar pattern of  
228 shelter size use in a broader representation of Hellbender size classes (Freake and DePerno,  
229 2017).

230 Flooding has been cited as a potential threat to Hellbender populations with several  
231 published reports of displaced, injured, and dead Hellbenders following high water events in  
232 other localities (Humphries, 2005; Miller and Miller, 2005; Bodinof et al., 2012a). Previous work  
233 in Little River suggested that flooding may be influential in the size structure of the Hellbender  
234 population with anecdotal evidence showing absent size classes correlating with major flooding  
235 events (Nickerson et al., 2007; Hecht-Kardasz et al., 2012). The shelters used by immature  
236 Hellbenders in Little River could provide a mechanistic explanation for this hypothesis. Many  
237 lotic organisms survive spates by seeking refugia (Giller and Malmqvist, 1998), including the  
238 interstitial spaces in the benthic layers, where larval *C. alleganiensis* have been located in other  
239 localities (Smith, 1907; Nickerson and Mays, 1973; Nickerson et al., 2003). As this habitat is not  
240 available to larval Hellbenders in Little River, larvae are utilizing the space under rocks at the  
241 surface of the streambed which may be less secure during flooding periods. While larvae utilized  
242 a wide variety of shelters in Little River, their habitat included much smaller shelter sizes than  
243 other stage classes including small and large cobble, and the average shelter size used by larvae  
244 was significantly smaller than sub-adults and adults. Smaller shelters may be easily moved by  
245 increased water current, increasing the risk of the Hellbender larvae underneath being crushed,  
246 swept downstream, or exposed to predators. Researchers recently found a crushed larvae in Little  
247 River following a high water event (Da Silva Neto et al., 2016). Related mortality or

248 displacement of immature Hellbenders during extreme flooding related to less secure habitats  
249 may partially be responsible for the size structure patterns previously found in Little River's  
250 captured Hellbender population (Hecht-Kardasz 2012). As increases in flood intensity and  
251 frequency are predicted with climate change (Easterling et al., 2000), this could be of  
252 conservation concern for Hellbenders, particularly in rivers with similar geomorphology although  
253 additional study is required.

254         Due to the lack of gravel bed habitat in Little River, the interstitial spaces among the  
255 gravel, cobble, and boulders beneath the larger shelter rocks may be particularly important to  
256 Hellbender larvae for additional protection and access to smaller food items. However, larvae  
257 were found directly under shelter rocks rather than underlying cobble or gravel (Hecht, pers. obs),  
258 and no difference in stream particle sizes below shelter rocks was noted among the stage classes.  
259 This suggests that other factors might be influencing habitat selection by Hellbenders in relation  
260 to substrate beneath shelter sites. For example, Bodinof et al (2012b) found that spacing of  
261 substrate was an important factor in Hellbender habitat selection for released captive raised  
262 Hellbenders, with individuals being more likely to select habitat resources where coarse substrate  
263 was touching.

264         Comparing streambed particle sizes at sites utilized by Hellbenders of all stage classes to  
265 randomly sampled localities revealed a negative association of occupancy with fine gravel, and a  
266 positive association of occupancy with very coarse gravel. It is unclear if these associations are  
267 due to habitat preferences and/or prey availability, or are simply related to space availability  
268 beneath shelter rocks. Smaller streambed particles could fill in the spaces underneath rocks,  
269 embedding them and leaving no area available for Hellbenders to occupy. Stream embeddedness  
270 has been negatively associated with the presence of other species of salamanders (Tumlinson and

271 Cline, 2003). Conversely, boulders or large cobble may leave too much space available beneath  
272 shelter rocks, leaving Hellbenders with reduced protection from stream flow, predators, and con-  
273 specifics. The association of shelters used by Hellbenders and medium-sized particles, like very  
274 coarse gravel, may represent a balance of space availability and protection as well as food  
275 availability. Other studies have examined the role of streambed particle sizes on the occupancy of  
276 Hellbenders (Keitzer et al., 2013; Maxwell, 2009; Burgmeier et al., 2011; Bodinof et al, 2012b)  
277 but have been unable to compare streambed particle association among stage classes. Most of  
278 these studies have focused on broader particle categories rather than the more fine scale  
279 categories used in this study, but have found a general association between gravel and/or cobble  
280 substrates and Hellbender occupancy. These types of streambed particles are known to harbor a  
281 number of salamander species including Hellbender larvae (Smith, 1907; Nickerson and Mays,  
282 1973; Tumlinson et al., 1990) and also serve as important macro-invertebrate habitat (Giller and  
283 Malmqvist, 1998; Hwa-Seong and Ward, 2007), which represent the most utilized food source  
284 for Hellbenders of all sizes.

285 Conductivity at larval sites was significantly different from adult sites. As conductivity  
286 measurements were low, and because there was little difference between the mean of the larval  
287 and other stage groups, it seems unlikely that this difference is biologically meaningful.  
288 However, conductivity impacts Hellbender distribution in other localities (Keitzer et al., 2013;  
289 Pitt et al., 2017; Bodinof Jachowski and Hopkins, 2018). No other correlations between  
290 Hellbender TL or stage class and measured water quality parameters were noted. The majority of  
291 individuals in all three stage classes were found in runs, so mixing may have created largely  
292 homogenized water quality conditions. Parameters including pH and conductivity showed little  
293 temporal or spatial variation during the survey period, but as Little River is fed by surface water,

294 water depth and water temperate varied due to fluctuations in precipitation. Because microhabitat  
295 parameters were assumed to be relatively constant through time, this study cannot conclusively  
296 rule out the effects of water depth and water temperature on ontogenetic habitat use during the  
297 survey period.

298 Our examination of Hellbender microhabitat associations assumed that individuals were  
299 associated with the microhabitat at diurnal capture sites for significant time periods, and  
300 Hellbenders had similar detection rates across stage classes. While most studies support an  
301 association of adult Hellbenders to seasonal or longer habitats (Smith, 1907; Green, 1933; Hillis  
302 and Bellis, 1971; Wiggs, 1977; Nickerson and Mays, 1973; Nickerson, 1980; Blais, 1996; Ball,  
303 2001), information regarding detectability, movement, activity, and site fidelity of immature  
304 Hellbenders is extremely limited. We are not aware of any studies available examining detection  
305 rates of immature Hellbenders. Since we did not find other available habitat types like gravel  
306 beds and leaf litter in the study sites and regularly located larval and sub-adult Hellbenders, we  
307 assumed that detectability rates were roughly the same among stage. Published information on  
308 larval movement is limited to a single observation of an individual moving along the stream  
309 margin an hour before sunset (Floyd et al., 2013). It is unclear whether *C. alleganiensis* larvae are  
310 nocturnal or diurnal in the wild, although Smith (1907) noted that hatchlings avoided light.  
311 Although it is also unknown whether wild Hellbender larvae leave shelter to forage, other  
312 salamander larvae have reduced activity levels in the presence of predators, including  
313 cannibalistic conspecifics (Colley et al., 1989). In addition macro-invertebrates found in larval  
314 Hellbender diets are plentiful beneath rocks in Little River (Hecht-Kardasz, 2011), thus low  
315 larval Hellbender activity might be expected. Larvae overwinter at male-guarded nest sites, and  
316 are believed to generally disperse sometime in spring or early summer (Bishop, 1941), prior to

317 the seasonal timeframe of this study. As we already discussed above, some larvae may leave nest  
318 shelters later in the summer, but those captured during this study were almost entirely solitary,  
319 making it likely that dispersion had already occurred. While it is not unreasonable to assume that  
320 young Hellbenders, like adults, are associated with specific locations for extended periods and  
321 that detection rates were similar among the stage classes, these assumptions cannot be confirmed,  
322 and therefore the results of the analyses presented here should be interpreted with caution.

323 Evidence is increasing that Hellbenders may exhibit ontogenetic shifts in habitat use, but  
324 the number of localities where larval individuals are found regularly is relatively small, making it  
325 difficult to determine how common this pattern may be across the range. Other streams may have  
326 low larval detection rates making it more difficult to locate and quantify larval habitat. Future  
327 tracking of larvae may help elucidate whether larvae are rare or are avoiding detection due to  
328 differences in microhabitat use. In addition, only a limited number of microhabitat parameters  
329 have been examined. Therefore, studies looking at additional parameters such as DO, stream  
330 flow, distance to bank, and shelter density are suggested. For these and already measured  
331 variables, an examination of upper and lower tolerances for stage classes may be more useful  
332 from an ecological and conservation standpoint than examining in situ differences in means for  
333 the groups alone. Studies on larval Hellbender microhabitat during other seasons are also needed  
334 to determine if ontogenetic differences in microhabitat use occur throughout the year or are only  
335 limited to summer months.

336 Potential habitat differences among stage classes should be considered in future  
337 conservation and habitat restoration efforts, especially as accounting for multiple stage classes  
338 can assist in amphibian conservation efforts (Swanack et al, 2009). Immature individuals may be  
339 an important component for increasing some Hellbender population sizes as demonstrated by

340 sensitivity analysis (Unger et al., 2013). Current Hellbender conservation efforts have focused  
341 heavily on head-starting and releasing individuals in order to boost adult populations. While these  
342 efforts are worthwhile and have proven successful (Bodinof et al., 2012a), consideration of  
343 immature Hellbender habitat at release and restoration sites is necessary to achieve the long-term  
344 goal of self-sustaining Hellbender populations. While related microhabitat needs may vary from  
345 site to site and should be studied in individual management areas, our study indicates that  
346 researchers and managers should consider heterogeneity in stream substrates, including fewer  
347 fine particles and more large gravel, in addition to a variety of boulders.

#### 348 **ACKNOWLEDGEMENTS**

349 Thank you to Dr. Marcy Souza, The Great Smoky Mountains Institute at Tremont, Dr. Perran  
350 Ross, Dr. Mary Christman, the Williams Lab at Purdue University, Andrea Drayer, Dr. Salvador  
351 Gezan, and all volunteers for assistance on this project. We would also like to acknowledge Paul  
352 Super, Keith Langdon, and the National Park Service. Financial support for this research was  
353 provided by the Great Smoky Mountains Conservation Association: Carlos C. Campbell  
354 Fellowship, The Reptile and Amphibian Conservation Corp (RACC), the Cryptobranchid Interest  
355 Group: Jennifer Elwood Conservation Grant. Research was conducted under permits from the  
356 National Park Service (GRSM-2009-SCI-0061, GRSM-20090056, GRSM-2008-SCI-0052,  
357 GRSM-00-131), and University of Florida ARC Protocol (#017-08WEC).

#### 358 **LITERATURE CITED**

359 **Aho, K.** 2014. asbio: A Collection of Statistical Tools for Biologists. R package version 1.3-1.  
360 <http://CRAN.R-project.org/package=asbio>



- 361 **Ball, B. S.** 2001. Habitat use and movements of eastern hellbenders, *Cryptobranchus*  
362 *alleganiensis alleganiensis*: A radiotelemetric study. M.S. Thesis, Appalachian State  
363 University, Boone, NC.
- 364 **Barriga, J. P., and M. A. Battini.** 2009. Ecological significances of ontogenetic shifts in the  
365 stream-dwelling catfish, *Hatcheria macraei* (Siluriformes, Trichomycteridae), in a  
366 Patagonian river. Ecology of Freshwater Fish 18(3):395 – 405.
- 367 **Bishop, S. C.** 1941. The Salamanders of New York. New York State Museum Bulletin, The  
368 University of the State of New York, Albany, NY.
- 369 **Blais, D. P.** 1996. Movement, home range, and other aspects of the biology of the eastern  
370 hellbender (*Cryptobranchus alleganiensis alleganiensis*): A radiotelemetric study. M.S.  
371 Thesis, State University of New York at Binghamton, Binghamton, NY.
- 372 **Bodinof, C. M., J. T. Briggler, R. E. Junge, T. Mong, J. Beringer, M. D. Wanner, C. D.**  
373 **Schuette, J. Ettling, and J. J. Millspaugh.** 2012a. Survival and body condition of  
374 captive-reared juvenile Ozark hellbenders (*Cryptobranchus alleganiensis bishopi*)  
375 following translocation to the wild. Copeia 2012(1):150 – 159.
- 376 **Bodinof, C. M., J. T. Briggler, R. E. Junge, J. Beringer, M. D. Wanner, C. D. Schuette, J.**  
377 **Ettling, and J. J. Millspaugh.** 2012b. Habitat attributes associated with short-term  
378 settlement of Ozark Hellbender (*Cryptobranchus alleganiensis bishopi*) salamanders  
379 following translocation to the wild. Freshwater Biology 2012(57):178 – 192.
- 380 **Bodinof Jachowski, C. M. and W. A. Hopkins.** 2018. Loss of catchment-wide riparian forest  
381 cover is associated with reduced recruitment in a long-lived amphibian. Biological  
382 Conservation 220:215 – 227.
- 383 **Burgmeier, N. G., T. M. Sutton, and R. N. Williams.** 2011. Spatial ecology of the Eastern  
384 Hellbender (*Cryptobranchus alleganiensis*) in Indiana. Herpetologica 67(2):135 – 145.

- 385 **Brown, J. H., and P. F. Nicoletto.** 1991. Spatial scaling of species composition: body masses of  
386 North American land mammals. *American Naturalist* 138(6):1478 – 1512.
- 387 **Cohen, J. E., S. L. Pimm, P. Y. Yodzis, and J. Saldana.** 1993. Body sizes of animal predators  
388 and animal prey in food webs. *Journal of Animal Ecology* 62(1):67 – 78.
- 389 **Colley, S. W., W. H. Keen, and R. W. Reed.** 1989. Effects of adult presence on behavior and  
390 microhabitat use of juveniles of a Desmognathine salamander. *Copeia* 1989(1):1 – 7.
- 391 **Da Silva Neto, J. G., W. B. Sutton, J. B. Giacomini, R. E. Freemon, and M. Freake.** 2016  
392 *Cryptobranchus alleganiensis alleganiensis* (Eastern Hellbender). Mortality.  
393 *Herpetological Review* 47(1):98 – 99.
- 394 **Easterling, D. R., G. A. Meehl, C. Parmesan, S. A. Changnon, T. R. Karl, and L. O.**  
395 **Mearns.** 2000. Climate extremes: Observations, modeling, and impacts. *Science*  
396 289(5487):2068 – 2074.
- 397 **Fitch, F. W.** 1947. A record *Cryptobranchus alleganiensis*. *Copeia* 1947(3):210.
- 398 **Flinders, C. A., and D. D. Magoulick.** 2007. Habitat use and selection within Ozark lotic  
399 crayfish assemblages: spatial and temporal variation. *Journal of Crustacean Biology*  
400 27(2):242 – 254.
- 401 **Floyd, T. M, T. S. M. Stratmann, G. J. Brown, III, and S. Pfaff.** 2013. *Cryptobranchus*  
402 *alleganiensis alleganiensis*. Terrestrial Movement. *Herpetological Review* 44(4): 651.
- 403 **Foster, R. L., A. M. McMillan, and K. J. Roblee.** 2009. Population status of hellbender  
404 salamanders (*Cryptobranchus alleganiensis*) in the Alleghany River Drainage of New  
405 York State. *Journal of Herpetology* 43(4):579 – 588.
- 406 **Foster, S. A., V. B. Garcia, and M. Y. Town.** 1988. Cannibalism as the cause of an ontogenetic  
407 shift in habitat use by fry of the threespine stickleback. *Oecologia* 74(4):577 – 585.

- 408 **Freake, M. J., and C. S. DePerno.** Importance of demographic surveys and public lands for the  
409 conservation of eastern hellbenders *Cryptobranchus alleganiensis alleganiensis* in  
410 southeast USA. PLoS ONE 12(6): e0179153.
- 411 **Giller, P. S., and B. Malmqvist.** 1998. The Biology of Streams and Rivers. Oxford University  
412 Press, Inc., New York, NY.
- 413 **Giller, P. S., and N. Sangpradub.** 1993. Predatory foraging behaviour and activity patterns of  
414 larvae of two species of limnephilid cased caddis. Oikos 67(2):351 – 357.
- 415 **Gillooly J. F, J. H Brown, G. B. West, V. M. Savage, and E. L. Charnov.** 2001. Effects of size  
416 and temperature on metabolic rate. Science 293(5538):2248 – 2251.
- 417 **Groves, J. D., and L. A. Williams.** 2014. *Cryptobranchus alleganiensis alleganiensis* (Eastern  
418 Hellbender). Cannibalism. Herpetological Review 45(1):108 – 109.
- 419 **Groves, J. D., L. A. Williams, and S. P. Graham.** 2015. *Cryptobranchus alleganiensis*  
420 *alleganiensis* (Eastern Hellbender). Larval/adult association. Herpetological Review  
421 46(1):70 – 71.
- 422 **Green, N. B.** 1933. *Cryptobranchus alleganiensis* in West Virginia. Proceedings of the West  
423 Virginia Academy of Sciences 7:28 – 30.
- 424 **Green, N. B.** 1935. Further notes on the food habits of the water dog, *Cryptobranchus*  
425 *alleganiensis* Daudin. Proceedings of the West Virginia Academy of Sciences 9:36.
- 426 **Hall, D. J., and E. E. Werner.** 1977. Seasonal distribution and abundance of fishes in the littoral  
427 zone of a Michigan Lake. Transactions of the American Fisheries Society 106(6):545 –  
428 555.
- 429 **Harrell, F.** 2015. rms: Regression Modeling Strategies. R package version 4.4-0.  
430 <http://CRAN.R-project.org/package=rms>

- 431 **Hecht K. A., M. A. Nickerson, and P. Colclough.** 2017. Hellbenders (*Cryptobranchus*  
432 *alleganiensis*) May Exhibit an Ontogenetic Dietary Shift. *Southeastern Naturalist*  
433 16(2):157 – 162.
- 434 **Hecht-Kardasz, K.** 2011. Influence of geomorphology on the population structure and ecology  
435 of the Hellbender salamander (*Cryptobranchus alleganiensis*). M.S. Thesis, University of  
436 Florida, Gainesville, FL.
- 437 **Hecht-Kardasz, K. A, M. A. Nickerson, M. Freake, and P. Colclough.** 2012. Population  
438 structure of the Hellbender (*Cryptobranchus alleganiensis*) in a Great Smoky Mountains  
439 stream. *Bulletin of the Florida Museum of Natural History* 51:227 – 241.
- 440 **Hillis, R. E., and E. D. Bellis.** 1971. Some aspects of the ecology of the hellbender,  
441 *Cryptobranchus alleganiensis alleganiensis*, in a Pennsylvania stream. *Journal of*  
442 *Herpetology* 5(3-4):121 – 126.
- 443 **Holomuzki, J. R., and T. M. Short.** 1990. Ontogenetic shifts in habitat use and activity in a  
444 stream-dwelling isopod. *Holarctic Ecology* 13:300 – 307.
- 445 **Humphries, W. J.** 2005. *Cryptobranchus alleganiensis* (hellbender). Displacement by a flood.  
446 *Herpetological Review* 36(4):428.
- 447 **Humphries, W. J., M. Solis, C. Cardwell, and A. Salveter.** 2005. *Cryptobranchus*  
448 *alleganiensis* (Hellbender). Cannibalism. *Herpetological Review* 36(4):428
- 449 **Humphries, W. J, and T. K. Pauley.** 2005. Life history of the Hellbender, *Cryptobranchus*  
450 *alleganiensis*, in a West Virginia stream. *American Midland Naturalist* 154:125 – 142
- 451 **Hutchinson, G. E., and R. H. MacArthur.** 1959. A theoretical ecological model of size  
452 distributions among species of animals. *American Naturalist* 93(869):117 – 125.

- 453 **Hwa-Seong, J., and G. M. Ward.** 2007. Life history and secondary production of *Glossosoma*  
454 *nigrum* Banks (Trichoptera: Glossosomatidae) in two Alabama streams with different  
455 geology. *Hydrobiologia* 575:245 – 258.
- 456 **Keitzer, S. C., T. K. Pauley, and C. L. Burcher.** 2013. Stream characteristics associated with  
457 site occupancy by the Eastern Hellbender, *Cryptobranchus alleganiensis alleganiensis*, in  
458 Southern West Virginia. *Northeastern Naturalist* 20(4):666 – 667.
- 459 **Keren-Rotem, T., A. Bouskila, and E. Geffen.** 2006. Ontogenetic habitat shift and risk of  
460 cannibalism in the common chameleon (*Chamaeleo chamaeleon*). *Behavioral Ecology*  
461 *and Sociobiology* 59(6):723 – 731.
- 462 **King A. J.** 2005. Ontogenetic dietary shifts of fishes in an Australian floodplain river. *Marine*  
463 *and Freshwater Research* 56(2):215 – 225.
- 464 **Lane, E. W.** 1947. Report of the subcommittee on sediment terminology. *Eos, Transactions*  
465 *American Geophysical Union*, 28(6): 936 – 938.
- 466 **Madden, M., R. Welch, T. R. Jordan, and P. Jackson.** 2004. Digital Vegetation Maps for the  
467 Great Smoky Mountains National Park. Final Report to U.S. Department of Interior,  
468 National Park Service, Great Smoky Mountains National Park, Gatlinburg, Tennessee, 44  
469 p.
- 470 **Mast, M. A., and J. T. Turk.** 1999. Environmental characteristics and water quality of  
471 hydrologic benchmark network stations in the eastern United States, 1963–95. U.S.  
472 Geological Survey Circular 1173–A, 158 p.
- 473 **Maxwell, N. J.** 2009. Baseline survey and habitat analysis of aquatic salamanders in the Pigeon  
474 River, North Carolina. M.S. Thesis. University of Tennessee, Knoxville. 55 p.
- 475 **Merigoux, S., and D. Ponton.** 1998. Body shape, diet, and ontogenetic shifts in young fish of the  
476 Sinnamary River, French Guiana, South America.

- 477 **Miller, B. T., and Miller, J. L.** 2005. Prevalence of physical abnormalities in eastern Hellbender  
478 (*Cryptobranchus alleganiensis alleganiensis*) populations of middle Tennessee.  
479 Southeastern Naturalist, 4(3):513 – 520.
- 480 **Mittelbach, G. G.** 1981. Foraging efficiency and body size: A study of optimal diet and habitat  
481 use by bluegills. Ecology 62(5):1370 – 1386.
- 482 **National Oceanic and Atmospheric Administration.** 2016. National Centers for Environmental  
483 Information. Data Tools: 1981-2010 Normals. Station Townsend S 5, TN, US.  
484 <http://www.ncdc.noaa.gov/cdo-web/datatools/normals>. Accessed 30 May 2016.
- 485 **Netting, M. G.** 1929. The food of the Hellbender, *Cryptobranchus alleganiensis* (Daudin).  
486 Copeia 1929:23 – 24.
- 487 **Nickerson, M. A., and C. E. Mays.** 1973. The Hellbenders: North American Giant Salamanders.  
488 Milwaukee Public Museum, Milwaukee, 106 p.
- 489 **Nickerson, M. A.** 1980. Return of captive Ozark hellbenders, *Cryptobranchus alleganiensis*  
490 *alleganiensis*, to site of capture. Copeia 1980(3):536 – 537.
- 491 **Nickerson, M. A., K. L. Krykso, and R. D. Owen.** 2003. Habitat differences affecting age class  
492 distributions of the Hellbender salamander, *Cryptobranchus alleganiensis*. Southeastern  
493 Naturalist 2:619 – 29.
- 494 **Nickerson, M. A., A. L. Pitt, and M. D. Prysby.** 2007. The effects of flooding on the  
495 Hellbender salamander, *Cryptobranchus alleganiensis* DAUDIN, 1803, populations.  
496 Salamandra 43(2):111 – 117.
- 497 **Peterson, C. L.** 1989. Seasonal food habits of *Cryptobranchus alleganiensis* (Caudata:  
498 Cryptobranchidae). The Southwestern Naturalist 34:438 – 441.
- 499 **Petranka, J. W.** 1984. Ontogeny of the diet and feeding behavior of *Eurycea bislineata* larvae.  
500 Journal of Herpetology 18(1):48 – 55.

- 501 **Pitt, A. L., and M. A. Nickerson.** 2006. *Cryptobranchus alleganiensis* (Hellbender salamander).  
502 Larval diet. Herpetological Review 37(1):69.
- 503 **Pitt, A. L., J. T. Tavano, and M. A. Nickerson.** 2016. *Cryptobranchus allegnaniensis bishopi*  
504 (Ozark Hellbender): Larval habitat and retreat behavior. The Herpetological Bulletin 138:  
505 36 – 37.
- 506 **Pitt, A. L., J. L. Shinskie, J. J. Tavano, S. M. Hartzell, T. Delahunty, and S. F. Spear.** 2017.  
507 Decline of a giant salamander assessed with historical records, environmental DNA and  
508 multi-scale habitat data. Freshwater Biology 62(6):967 – 976.
- 509 **R Core Team.** 2015. R: A language and environment for statistical computing. R Foundation for  
510 Statistical Computing, Vienna, Austria. URL <https://www.R-project.org/>.
- 511 **Rojas, J. M., and F. P. Ojeda.** 2010. Spatial distribution of intertidal fishes: a pattern dependent  
512 on body size and predation risk? Environmental Biology of Fishes 87(3):175 – 185.
- 513 **Rosenberger, A., and P. L. Angermeier.** 2003. Ontogenetic shifts in habitat use by the  
514 endangered Roanoke logperch (*Percina rex*). Freshwater Biology 48(9): 1563 – 1577.
- 515 **Schoener, T. W.** 1974. Resource partitioning in ecological communities. Science 185(4145): 27  
516 – 39.
- 517 **Simonovic P. D., P. Garner, E. E. Eastwood, V. Kovac, and G. H. Copp.** 1999.  
518 Correspondence between ontogenetic shifts in morphology and habitat use in minnow  
519 *Phoxinus phoxinus*. Environmental Biology of Fishes 56(1):117 – 128.
- 520 **Smith, B. G.** 1907. The life history and habits of *Cryptobranchus alleganiensis*. Biological  
521 Bulletin 13(1):5 – 39.
- 522 **Swanack, T. M., W. E. Grant, and M. R. J. Forstner.** 2009. Projecting population trends of  
523 endangered amphibian species in the face of uncertainty: a pattern-oriented approach.  
524 Ecological Modelling 220:148–159.

- 525 **Tumlinson, R., and G. R. Cline.** 2003. Association between the Oklahoma Salamander  
526 (*Eurycea tynerensis*) and Ordovician-Silurian Strata. *The Southwestern Naturalist*  
527 48(1):93 – 95.
- 528 **Tumlinson, R., G. R. Cline, and P. Zwank.** 1990. Surface habitat associations of the Oklahoma  
529 salamander (*Eurycea tynerensis*). *Herpetologica* 46:169 – 175.
- 530 **Unger, S. D., T. M. Sutton, and R. N. Williams.** 2013. Projected population persistence of  
531 eastern hellbenders (*Cryptobranchus alleganiensis alleganiensis*). *Journal for Nature*  
532 *Conservation* 21:423 – 432.
- 533 **Urban, M. C.** 2008. Salamander evolution across a latitudinal cline in gape-limited predation  
534 risk. *Oikos* 117(7):1037 – 1049.
- 535 **Werner E. E., and J. F. Gilliam.** 1984. The Ontogenetic Niche and Species Interactions in Size-  
536 Structured Populations. *Annu Rev Ecol Syst* 15:393 – 425.
- 537 **Werner, E. E., and D. J. Hall.** 1988. Ontogenetic habitat shifts in bluegill: The foraging rate-  
538 predation risk trade-off. *Ecology* 69(5):1352 – 1366.
- 539 **Wiggs, R. L.** 1977. Movement and homing in the hellbender, *Cryptobranchus alleganiensis*, in  
540 the Niangua River, Missouri. M.A. Thesis, Southwest Missouri State, Springfield, MO.
- 541 **Wilson, D. S.** 1975. The adequacy of body size as a niche difference. *The American Naturalist*  
542 109(970): 769 – 784.
- 543 **Wolman, M. G.** 1954, A method of sampling coarse river-bed material: *Transactions of the*  
544 *American Geophysical Union (EOS)* 35:951 – 956.
- 545 **Woodward, G., B. Ebenman, M. Emmerson, J. M. Montoya, J. M. Olesen, A. Valido, and P.**  
546 **H. Warren.** 2005. Body size in ecological networks. *Trends in Ecology & Evolution*  
547 20(7): 402 – 409.
- 548



549 **TABLES**

550 Table 1. Variable estimates and odds ratios from an ordinal logistic regression model based on  
551 streambed particle size classes at sites used by larval (n = 25), sub-adult (n=26), and adult (n=38)  
552 Hellbenders (*Cryptobranchus alleganiensis*) captured in Little River, Tennessee.

| Variable           | Estimate | Standard<br>error | Wald statistic (Z) | p-value | Odds<br>ratio |
|--------------------|----------|-------------------|--------------------|---------|---------------|
| <4 mm              | 1.09     | 1.36              | 0.80               | 0.43    | 2.96          |
| Fine gravel        | 0.66     | 1.13              | 0.58               | 0.56    | 1.93          |
| Medium gravel      | -0.39    | 0.54              | -0.73              | 0.47    | 0.68          |
| Coarse gravel      | -0.23    | 0.48              | -0.48              | 0.62    | 0.79          |
| Very coarse gravel | 2.13     | 1.20              | 1.78               | 0.07    | 8.45          |
| Small cobble       | -0.54    | 0.46              | -1.19              | 0.23    | 0.58          |
| Large cobble       | -0.52    | 0.49              | -1.06              | 0.29    | 0.59          |

553

554

555 Table 2. Variable estimates and odds ratios from a binomial logistic regression model based on  
556 streambed particle size classes at sites used by Hellbenders (*Cryptobranchus alleganiensis*) (n =  
557 89) and random locations (n = 50) within Little River, Tennessee.

| Variable           | Estimate | Standard error | Wald statistic (Z) | p-value | Odds ratio |
|--------------------|----------|----------------|--------------------|---------|------------|
| Intercept          | -0.60    | 0.77           | -0.78              | 0.43    | 0.55       |
| <4 mm              | -1.40    | 0.82           | -1.71              | 0.09    | 0.25       |
| Fine gravel        | -1.89    | 0.71           | -2.67              | 0.01    | 0.15       |
| Medium gravel      | -0.35    | 0.60           | -0.58              | 0.56    | 0.71       |
| Coarse gravel      | 0.95     | 0.54           | 1.76               | 0.08    | 2.60       |
| Very coarse gravel | 1.56     | 0.64           | 2.46               | 0.01    | 4.78       |
| Small cobble       | -0.25    | 0.51           | -0.49              | 0.62    | 0.78       |
| Large cobble       | 1.00     | 0.67           | 1.49               | 0.14    | 2.71       |

558

559

560

561

562

563

564 **FIGURE LEGENDS**

565 Figure 1. Bar graph showing mean  $\pm$  standard error of the mean (SEM) for conductivity ( $\mu\text{S}/\text{cm}$ )  
566 used by three stage classes of *Cryptobranchus alleganiensis*, larvae (n = 13), sub-adults (n = 22),  
567 and adults (n = 43), in Little River, Tennessee. Bars with different letters above are significantly  
568 different ( $p < 0.05$ ).

569 Figure 2. Scatter plot with linear regression line of shelter size (mm) vs. *Cryptobranchus*  
570 *alleganiensis* total length (mm) in Little River, Tennessee (n = 217) ( $R^2 = 0.266$ ;  $p < 0.001$ ).

571 Figure 3. Bar graph showing mean  $\pm$  standard error of the mean (SEM) for shelter size (mm) used  
572 by three stage classes of *Cryptobranchus alleganiensis*, larvae (n = 61), sub-adults (n = 56), and  
573 adults (n = 100), in Little River, Tennessee. Bars with different letters above are significantly  
574 different ( $p < 0.05$ ).

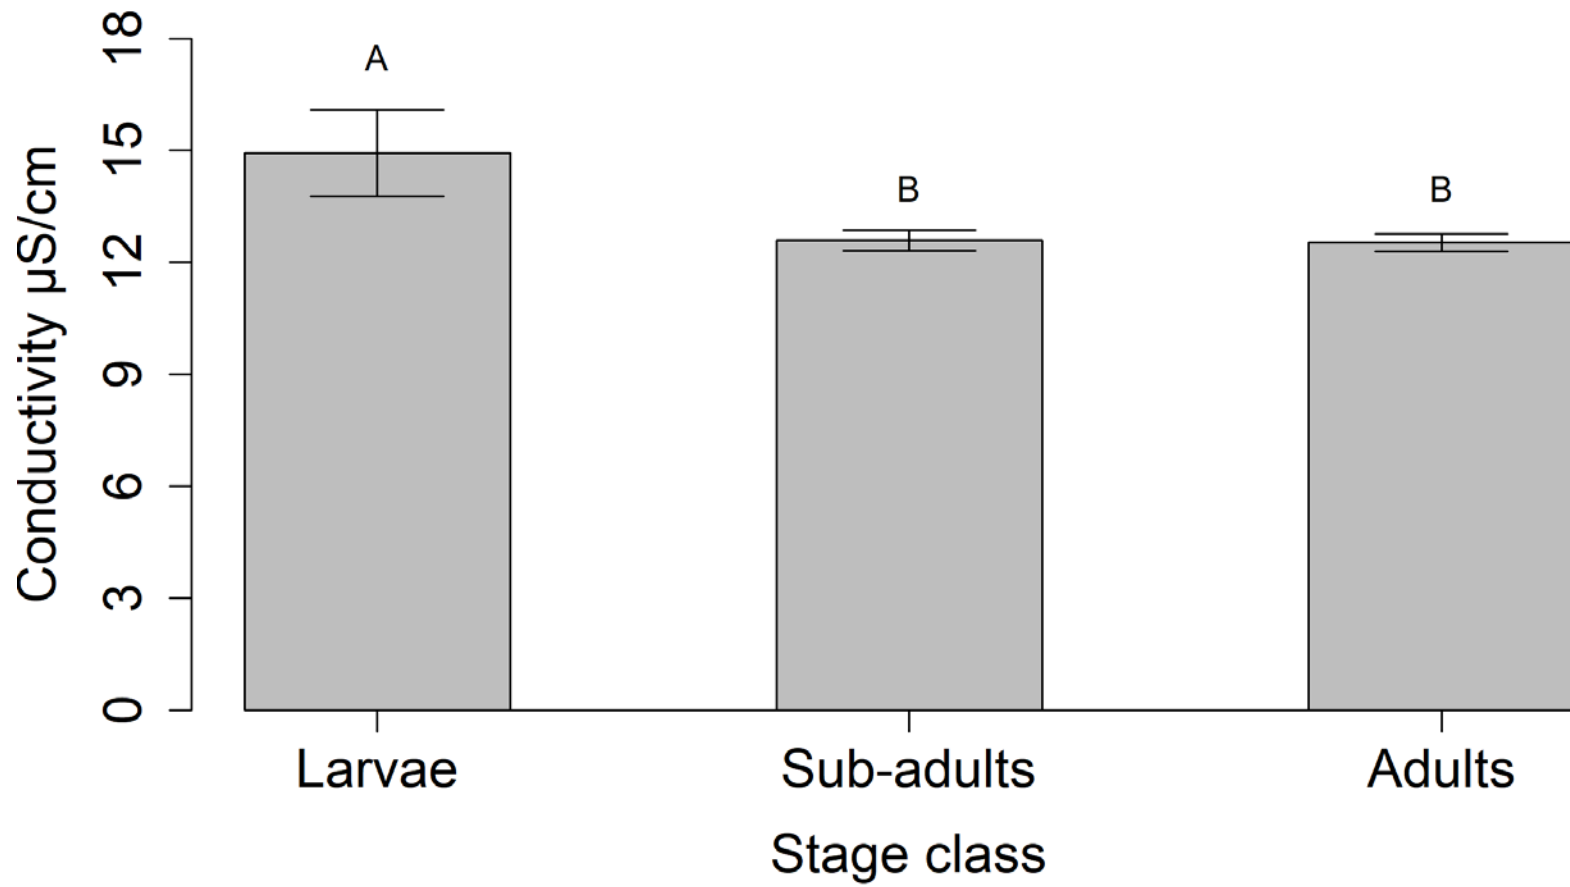

575

576

577

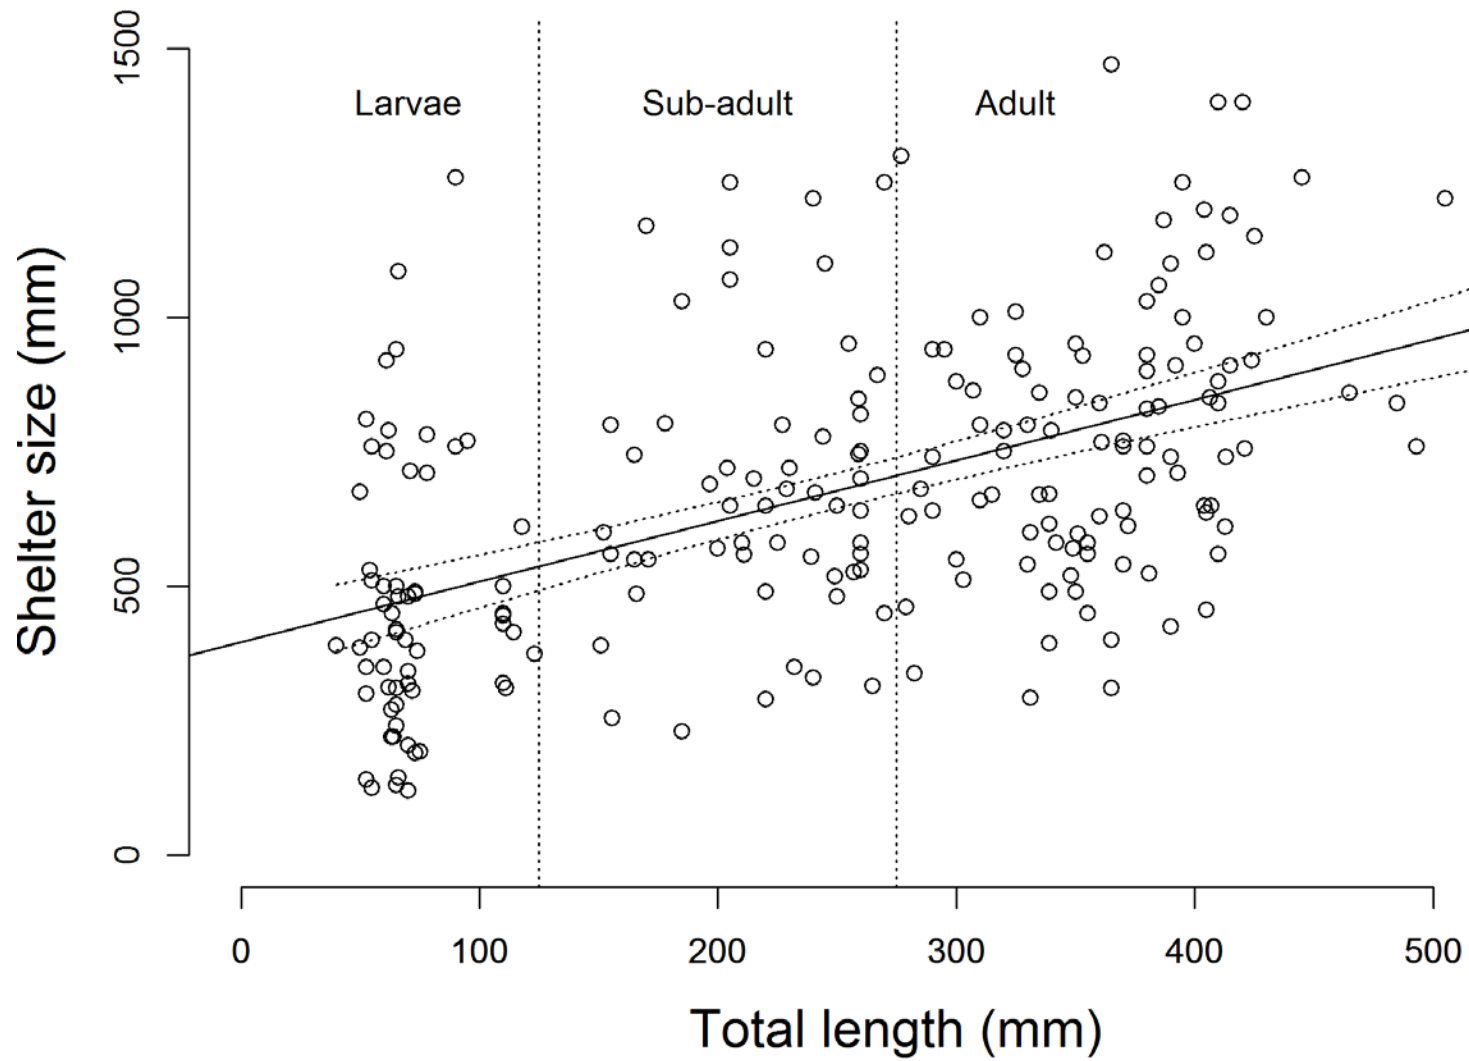

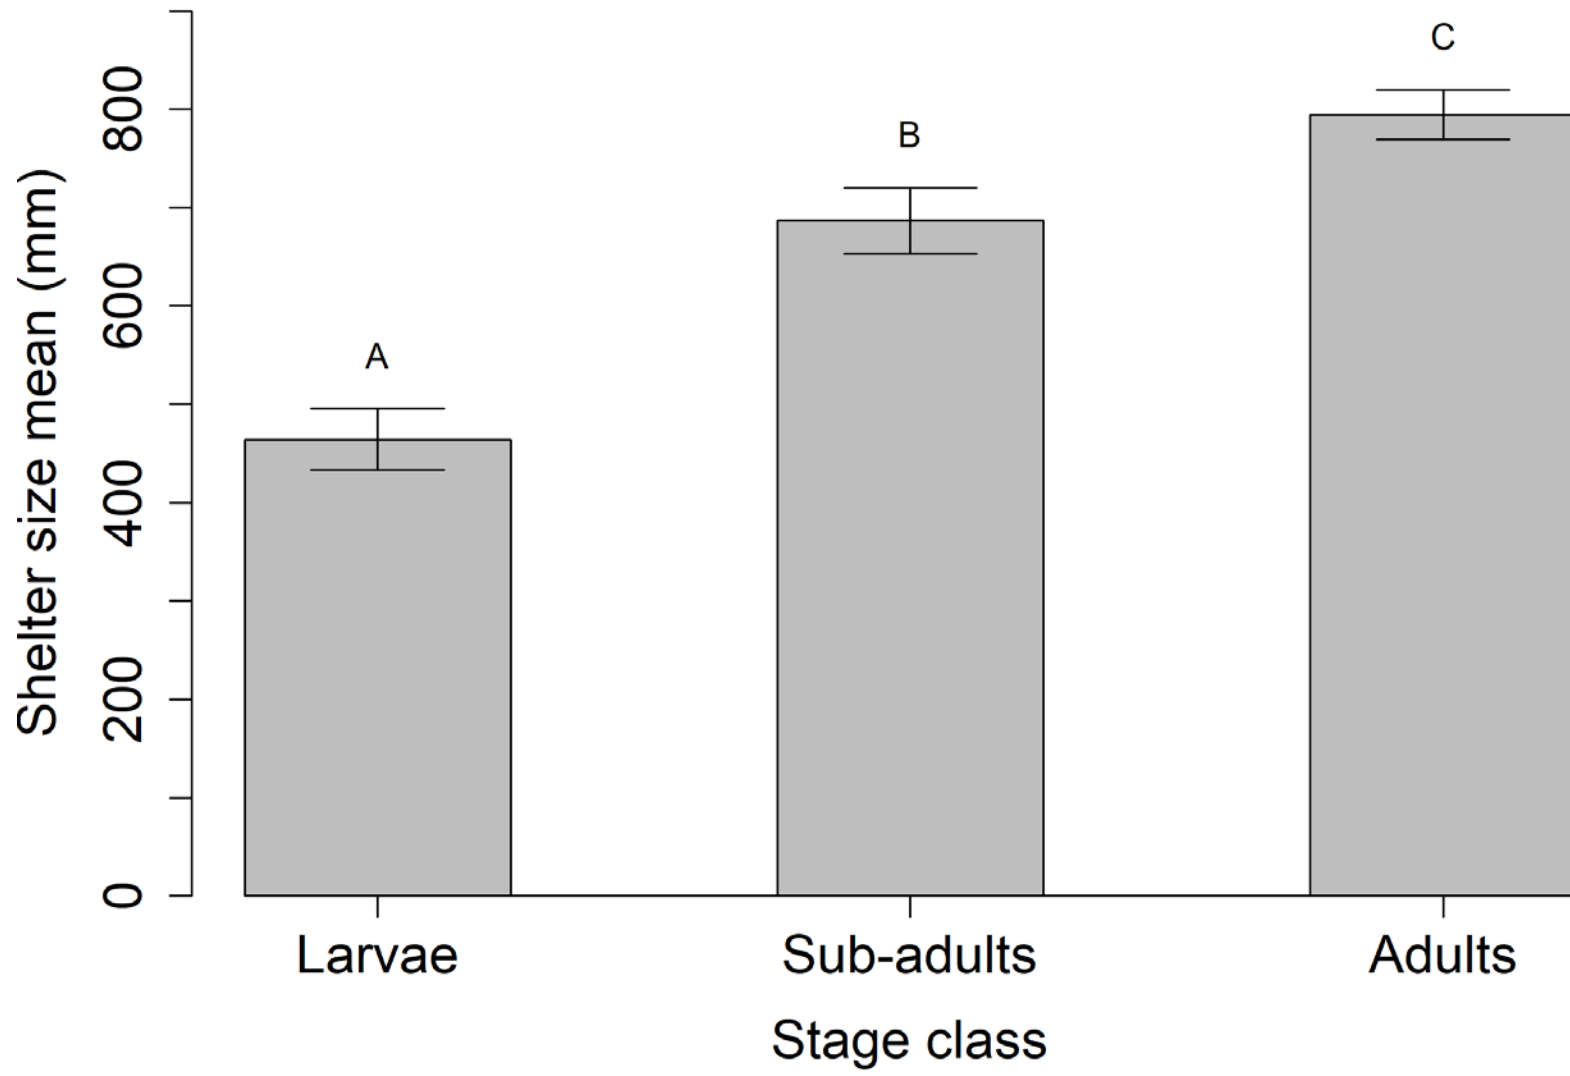

Source: https://www.biorxiv.org/content/10.1101/139766v2.full.pdf
